# Supplementary material for: Designing effective solid catalysts for biomass conversion: aerobic oxidation of ethyl lactate to ethyl pyruvate
Source: Royal Society of Chemistry journal article supplement (doi:10.1039/c8gc00032h), 2018-01-01
Supplement: c8gc00032h1.pdf [file c8gc00032h1.pdf]

**Supporting Information for the article:**

**Designing effective solid catalysts for biomass conversion:**

**Aerobic oxidation of ethyl lactate to ethyl pyruvate**

Wei Zhang, Bernd Ensing, Gadi Rothenberg and N. Raveendran Shiju\*

*Van't Hoff Institute for Molecular Sciences, University of Amsterdam, Science Park  
904, 1098 XH Amsterdam, The Netherlands.*

<http://hims.uva.nl/hcsc>

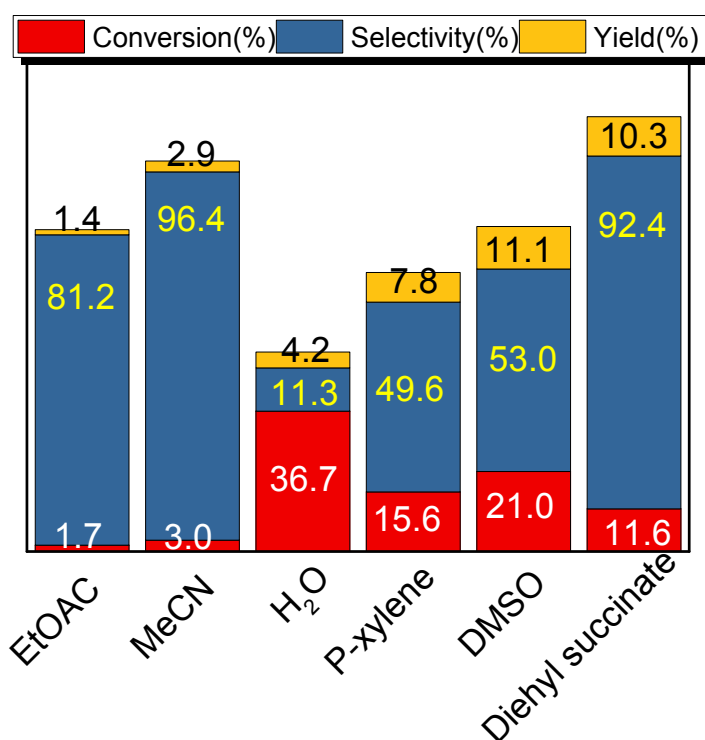

**Figure S1** Effect of reaction solvent for the oxidative dehydrogenation of ethyl lactate to ethyl pyruvate, reaction conditions: ethyl lactate 5 mmol, VO<sub>x</sub>/C 25 mg (0.15 mol% V), 1 atm O<sub>2</sub>, solvent, 1 ml, 100 °C, 4h.

**Table S1.** Influence of Brønsted / Lewis base on oxidation of ethyl lactate to ethyl pyruvate reaction.<sup>a</sup>

| Entry | Additive                        | pK <sub>b</sub> | Conversion (%) <sup>b</sup> | Product selectivity (%) <sup>b</sup> |              |         |      |        | Ethyl pyruvate yield (%) |
|-------|---------------------------------|-----------------|-----------------------------|--------------------------------------|--------------|---------|------|--------|--------------------------|
|       |                                 |                 |                             | Ethyl pyruvate                       | acetaldehyde | ethanol | AcOH | others |                          |
| 1     | —                               | —               | 11                          | 86                                   | 1            | 3       | 1    | 10     | 9                        |
| 2     | NaOH                            | 0.2             | 7                           | 30                                   | 5            | 51      | 2    | 13     | 2                        |
| 3     | Na <sub>2</sub> CO <sub>3</sub> | 3.7             | 7                           | 2                                    | 3            | 57      | 0    | 38     | 0                        |
| 4     | NaHCO <sub>3</sub>              | 7.9             | 6                           | 46                                   | 6            | 32      | 1    | 15     | 3                        |
| 5     | NaHSO <sub>4</sub>              | 12              | 12                          | 94                                   | 1            | 3       | 0    | 2      | 11                       |
| 6     | Piperidine                      | 2.7             | 18                          | 89                                   | 1            | 7       | 0    | 3      | 16                       |
| 7     | Diethylamine                    | 2.9             | 19                          | 84                                   | 1            | 13      | 0    | 2      | 16                       |
| 8     | Pyridine                        | 8.8             | 31                          | 93                                   | 1            | 3       | 1    | 2      | 29                       |
| 9     | Aniline                         | 9.4             | 11                          | 89                                   | 1            | 5       | 0    | 6      | 10                       |

<sup>[a]</sup> Reaction conditions: ethyl lactate 5 mmol, additive 5 mol%, VO<sub>x</sub>/C 25 mg (0.15 mol% V), 1 atm O<sub>2</sub>, diethyl succinate (solvent, 1 ml), 130 °C, 1 h. <sup>[b]</sup> Determined by GC using biphenyl as an internal standard.

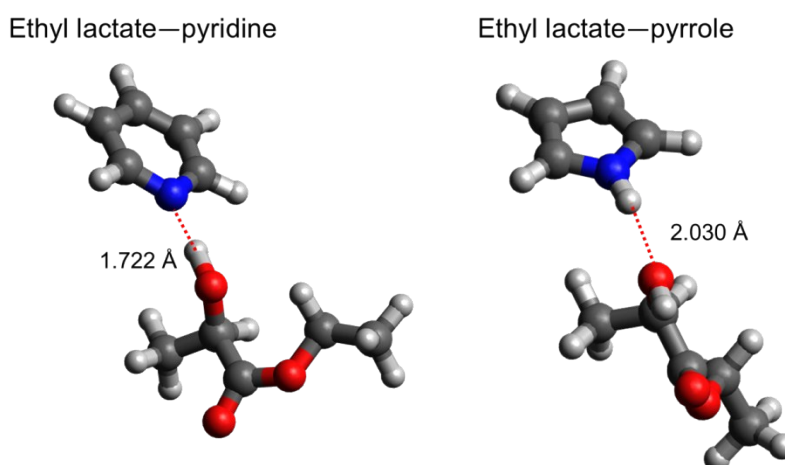**Figure S2.** The Optimized geometries: ethyl lactate interacts with pyridine; ethyl lactate interacts with pyrrole.

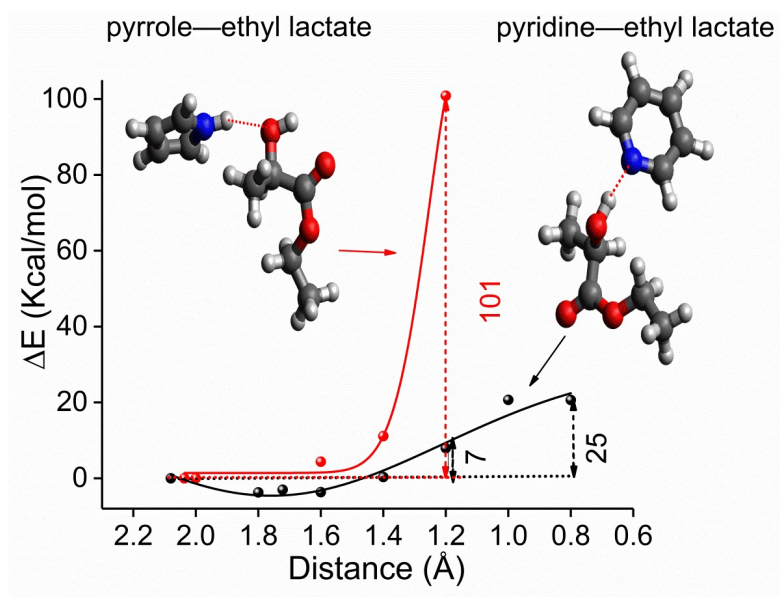

**Figure S3.** The relative potential energy plotted against the distance between ethyl lactate and pyridine and pyrrole, respectively. At each step, we first fixed the distance, and then calculated the potential energy of the optimized geometry (see Figure 3). At long distances, the interaction energy approaches zero. Here we assign the zero point distance as 2.3 Å. Shortening the distance from 2.3 Å to 1.2 Å gives energy barriers of 7 kcal/mol and 101 kcal/mol for EL-pyridine and EL-pyrrole, respectively. Indeed, even at a distance of only 0.8 Å the energy barrier for EL-pyridine increases only to 25 kcal/mol.) This higher energy barrier in the case of pyrrole can explain why pyrrole compounds suppress the reaction, while, pyridine helps to catalyse it.

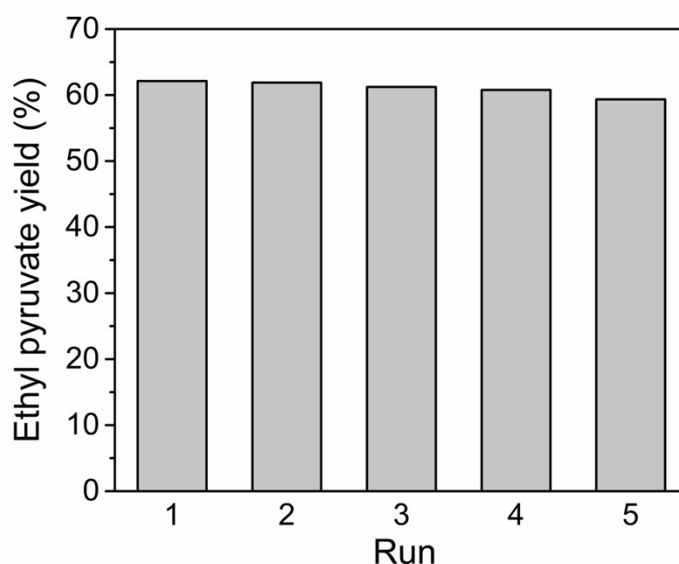

**Figure S4.** Recycling of  $\text{VO}_x/\text{P4VP}$  catalyst in the oxidation of ethyl lactate to ethyl pyruvate. Reaction conditions: ethyl lactate 5 mmol, catalyst:  $\text{VO}_x/\text{P4VP}$  25 mg, 1 atm  $\text{O}_2$ , diethyl succinate (solvent, 1 ml). 130 °C, 4 h.

**Table S2.** Catalytic activity of analogous heterogeneous catalyst systems for the liquid-phase oxidation of lactate to pyruvate.

| Entry | Catalyst                     | Oxidant                       | lactate type   | additive         | Temp. (°C) | Pressure (MPa) | Time   | Sel. (%) | Yield (%) | Journal Year       | Ref. |
|-------|------------------------------|-------------------------------|----------------|------------------|------------|----------------|--------|----------|-----------|--------------------|------|
| 1     | TiO <sub>2</sub>             | O <sub>2</sub>                | ethyl lactate  | -                | 130        | 1              | 6h     | 75       | 37.5      | Green Chem., 2014  | 1    |
| 2     | 3Pb-1Pt/C                    | H <sub>2</sub> O <sub>2</sub> | lactic acid    | LiOH             | 90         | 0.1            | 20 min | 91.3     | 60        | Appl.Catal.A, 2017 | 2    |
| 3     | Hemoglobin -NaD <sup>+</sup> | H <sub>2</sub> O <sub>2</sub> | sodium lactate | phosphate buffer | 30         | 0.1            | 50h    | 94       | 81        | ChemSusChem, 2017  | 3    |
| 5     | TS-1                         | H <sub>2</sub> O <sub>2</sub> | ethyl lactate  | -                | 50         | 0.1            | 9h     | 97.8     | 97.8      | ACS Catal. 2018    | 4    |
| 4     | VTN                          | O <sub>2</sub>                | ethyl lactate  | -                | 130        | 0.1            | 3h     | 91       | 47.3      | ACS Catal. 2018    | 5    |
| 6     | VO <sub>x</sub> /P4VP        | O <sub>2</sub>                | ethyl lactate  | -                | 130        | 0.1            | 8h     | 90       | 75.6      | This work          | -    |

## References

1. E. V. Ramos-Fernandez, N. J. Geels, N. R. Shiju and G. Rothenberg, *Green Chem.*, 2014, **16**, 3358.
2. C. Zhang, T. Wang and Y. J. Ding, *Appl. Catal. A*, 2017, **533**, 59.
3. H.-Y. Jia, M.-H. Zong, H.-L. Yu and N. Li, *ChemSusChem*, 2017, **10**, 3524.
4. T. Lu, J. Zou, Y. Zhan, X. Yang, Y. Wen, X. Wang, L. Zhou and J. Xu, *ACS Catal.*, 2018, **8**, 1287.
5. W. Zhang, G. Innocenti, P. Oulego, V. Gitis, H.-H. Wu, B. Ensing, F. Cavani, G. Rothenberg and N. R. Shiju, *ACS Catal.*, 2018, DOI: 10.1021/acscatal.7b03843.
